# Supplementary material for: Muscle morphology and architecture of the medial gastrocnemius between typically developing children with different ancestral backgrounds
Source: medRxiv preprint, doi:10.1101/2023.01.10.23284392, version 1 (2023-01-11)
Supplement: supplementary table I [file 284392_file10.docx]

**Supplementary table I**

| **Age** | **H (n)** | **M (n)** | **J (n)** |
| --- | --- | --- | --- |
| 5 | 6 | 6 | 3 |
| 6 | 7 | 9 | 5 |
| 7 | 6 | 6 | 5 |
| 8 | 4 | 5 | 6 |
| 9 | 6 | 4 | 6 |
| 10 | 5 | 4 | 7 |
| **Gender (Boys/Girls)** | 15/19 | 17/17 | 13/19 |
|  |  |  |  |

De number (n) of Hindustani (H), Maroon (M) and Javanese (J) children that participated in the study per age category. Also the number of boys and girls that were included per ancestry are shown.
